# Supplementary material for: Carbon nanotube-induced migration of silver nanowire networks into plastic substrates via Joule heating for high stability
Source: Royal Society of Chemistry journal article supplement (doi:10.1039/c6ra17771a), 2016-01-01
Supplement: c6ra17771a1.pdf [file c6ra17771a1.pdf]

## Supplementary information

### Carbon nanotube-induced migration of silver nanowire networks into plastic substrates for high stability

*Jong Seok Woo<sup>1,2</sup>, Byung Kuk Kim<sup>1</sup>, Ho Young Kim<sup>1</sup>, Geon-Woong Lee<sup>1</sup>, Soo-Young Park<sup>2</sup> and*

*Joong Tark Han<sup>1</sup>*

<sup>1</sup>Nano Hybrid Technology Research Center, Korea Electrotechnology Research Institute,  
Changwon 641-120, Republic of Korea

<sup>2</sup>Department of Polymer Science & Engineering, Polymeric Nanomaterials Laboratory,  
School of Applied Chemical Engineering, Kyungpook National University, #1370 Sangyuk-  
dong, Buk-gu, Daegu 702-701, Republic of Korea

\* Corresponding authors.

E-mail address: jthan@keri.re.kr (J. T. Han); psy@knu.ac.kr (S.-Y. Park)

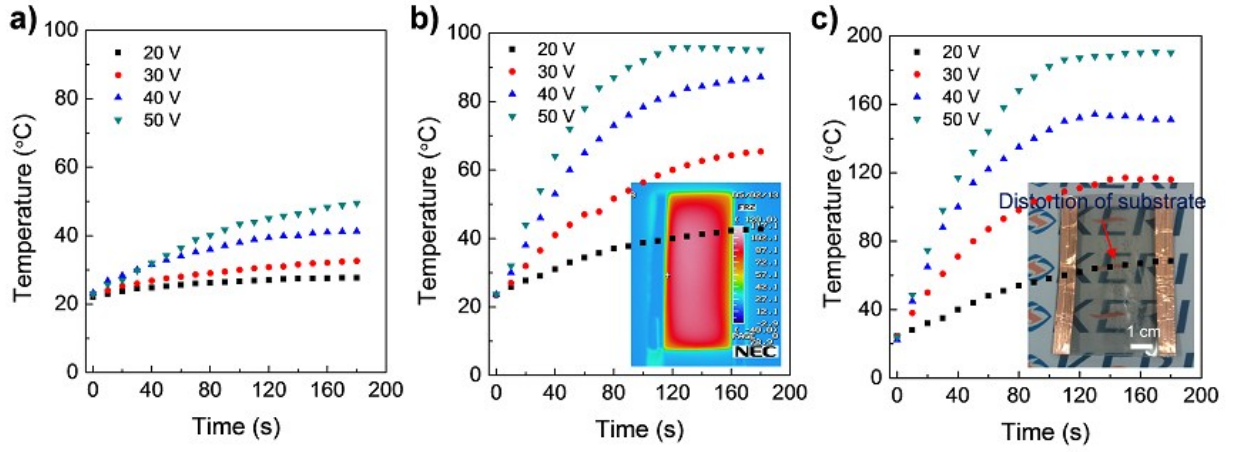

**Fig. S1.** Time versus temperature profiles at various applied DC voltages for SWCNTs with  $R_s$  of (a) 1000, (b) 250, and (c) 100  $\Omega/\text{sq}$ .

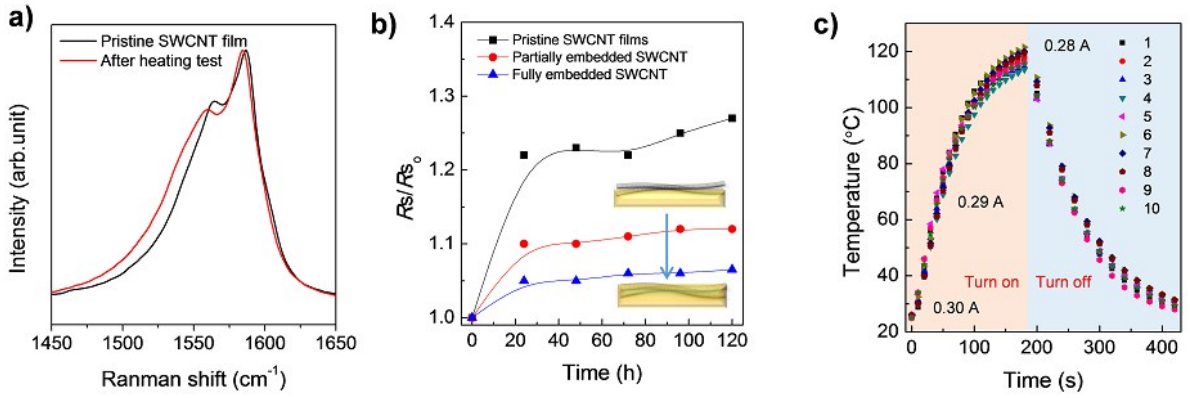

**Fig. S2.** (a) Raman spectra of the pristine SWCNT thin film and self-embedded SWCNT thin film after heating. (b) Hydrothermal stability of the pristine SWCNT and self-embedded SWCNT thin films (conditions: 80  $^{\circ}\text{C}$ ; 80% relative humidity). (c) Cycle test of the SWCNT heater ( $R_s = 100 \Omega/\text{sq}$ ; 30 V).

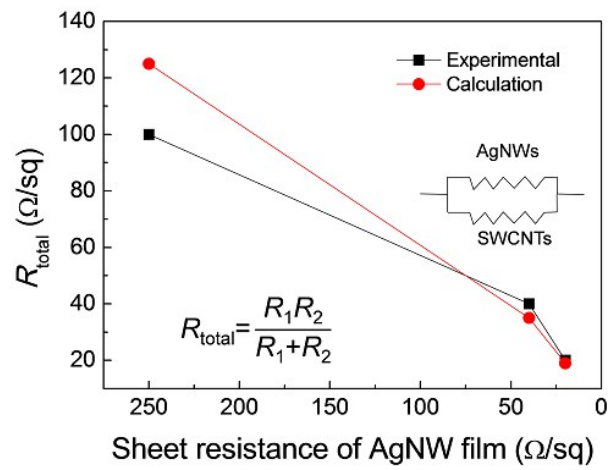

**Fig. S3.** Change in  $R_s$  in the parallel-resistor circuit model after over-coating SWCNTs on the AgNW networks.  $R_1$ :  $R_s$  of the AgNW film,  $R_2$ :  $R_s$  (250  $\Omega/\text{sq}$ ) of the SWCNT film.

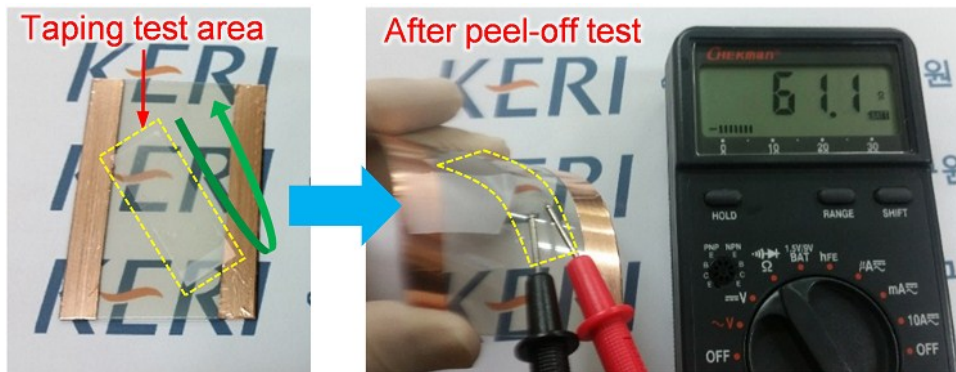

**Fig. S4.** Change in  $R_s$  after peel-off test of a flexible AgNW-SWCNT film on a PC substrate.

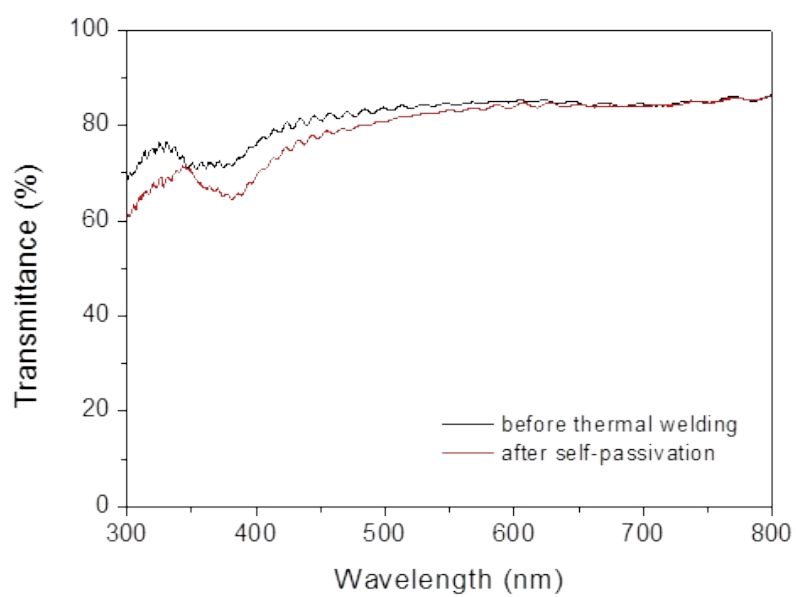

**Fig. S4.** The optical transmittance of the AgNW-SWCNT film before and after Joule heating.

**Table S1.** Power consumption of SWCNT and AgNW–SWCNT films.

| Heater               | Voltage (V) | Current (A) | Resistance (ohm/sq) | Power consumption (W) <sup>a</sup> |
|----------------------|-------------|-------------|---------------------|------------------------------------|
| SWCNT thin film      | 30          | 0.03        | 1000                | 0.9                                |
|                      |             | 0.067       | 450                 | 2.0                                |
|                      |             | 0.12        | 250                 | 3.6                                |
|                      |             | 0.30        | 100                 | 9.0                                |
| AgNW–SWCNT thin film | 40          | 0.4         | 100                 | 16                                 |
|                      | 20          | 0.5         | 40                  | 10                                 |
|                      | 15          | 0.75        | 20                  | 11.25                              |

<sup>a</sup>The power consumption was obtained from Joule's first law,  $P = V^2/R$  (where  $P$  is the power dissipated in a resistive conductor,  $V$  is the applied voltage, and  $R$  is the total resistance).

**Table S2.** Peel-off test results at different  $R_s$  values under different applied voltages.

| Heater               | Resistance (ohm/sq) | Voltage (V) | Steady-state temp. (°C) | Peel-off test |
|----------------------|---------------------|-------------|-------------------------|---------------|
| SWCNT thin film      | 1000                | 50          | 42                      | Failure       |
|                      | 450                 |             | 80                      |               |
|                      | 250                 |             | 100                     |               |
|                      | 100                 | 30          | 120                     | Partially     |
|                      |                     | 40          | 160                     | OK            |
|                      |                     | 50          | 190                     |               |
| AgNW–SWCNT thin film | 100                 | 40          | 160                     |               |
|                      | 40                  | 20          | 140                     |               |
|                      | 20                  | 15          | 160                     |               |
